# Supplementary material for: Is the reputation of Eucalyptus plantations for using more water than Pinus plantations justified?
Source: Copernicus journal article supplement (doi:10.5194/hess-26-5357-2022), 2022-10-27
Supplement: Supplementary file 1 [file hess-26-5357-2022-supplement.zip]

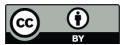

*Supplement of*

**Is the reputation of *Eucalyptus* plantations for using more water than *Pinus* plantations justified?**

**Don A. White et al.**

*Correspondence to:* Don A. White (whitegumfnrm@gmail.com)

- hess-26-5357-2022-supplement-title-page.pdf
- Supplementary Material HESS#revised post review.xlsx

The copyright of individual parts of the supplement might differ from the article licence.
