# Supplementary material for: Is the reputation of Eucalyptus plantations for using more water than Pinus plantations justified?
Source: Copernicus journal article supplement (doi:10.5194/hess-26-5357-2022), 2022-10-27
Supplement: Supplementary file 1 [file revised post review.xlsx]

## Sheet: VEE vs CWI
									Data in Yellow Cells estimated using CRU data (see paper for reference)											Data in Geen are measured data from associated paper										Calc R2 All Data		Calc R2 Euc		Calc R2 Pine
																				All	Euc	Pine								mean of VEE observed	R2 (all Data)	mean of VEE	R2(Euc	mean of VEE	R2(Euc
			Location (Decimal Degrees)						Measurement Duration		Plantation Life (from CRU Data, see paper for reference)				Measurement Period (from CRU Data)				w:	2.74	2.842	2.638								0.618755	0.693707	0.65611	0.800396	0.541705	0.62845
Genus	Site Name	Location	Latitude	Longitude	Method	Reference	Species	Planted	Commenced	Ended	Rain	PET	CWI plantation life	ET/Rain	Rain	PET	CWI measurement period	VEE actual euc	VEE-actual pine	VEE-predicted	VEE-predicted	VEE-predicted	Rain (Papers)	ET	T	VEE actual	VEE pred	Residual	Soil Depth	obs - mean ˆ2	pred-mean ˆ2	obs - mean ˆ2	pred-mean ˆ2	obs - mean ˆ2	pred-mean ˆ2		log residual
Euc	Jijou	Leizhou Peninsula, China	20.9	109.867	1	Lane, P.N.J. et al., 2004. Agricultural and Forest Meteorology, 124(3-4): 253-267.	E. urophylla	1996	2009	2011	2038.98	1478.16	1.37941	0.518116	2188.7	1461.7	1.49736	0.775808	#N/A	0.835378	0.84745	0.822072	1620	1134	533.5	0.775808	0.84745	-0.0716416	3.5	0.0246657	0.0523013	0.0143276	0.0366109
Euc	Hetou	Leizhou Peninsula, China	21.0833	109.9	1	Lane, P.N.J. et al., 2004. Agricultural and Forest Meteorology, 124(3-4): 253-267.	E. urophylla	1996	2009	2011	1821.27	1402.71	1.29839	0.526269	1892.57	1384.42	1.36705	0.719436	#N/A	0.811537	0.823843	0.798044	1920.3	996	522	0.719436	0.823843	-0.104406	3.5	0.0101367	0.0420609	0.00401019	0.0281342
Euc	Qipo	Guangxi Provice, China	22.6864	108.196	1	Ren, S. et al., 2019. Australian Forestry: 1-14.	E. urophylla	2010	2014	2015	1447.07	1347.42	1.07396	0.574601	1494.95	1359.75	1.09943	0.631732	#N/A	0.744921	0.757011	0.731763	1294	859	332.5	0.631732	0.757011	-0.125279	1	0.000168408	0.0191147	0.000594283	0.010181
Euc	Green Triangle 6	South Australia	-37.7392	140.794	1	Benyon, R.G., Theiveyanathan, S. and Doody, T.M., 2006. Australian Journal of Botany, 54(2): 181-192.	E. globulus	1998	2002	2005	731.125	1526.51	0.478953	0.983889	724.675	1540.01	0.470566	0.462985	#N/A	0.426046	0.430742	0.42073	701	713	402	0.462985	0.430742	0.0322431	10	0.0242644	0.0353491	0.0372975	0.050791														18.6
Euc	Green Triangle 8	South Australia	-37.7392	140.794	1	Benyon, R.G., Theiveyanathan, S. and Doody, T.M., 2006. Australian Journal of Botany, 54(2): 181-192.	E. globulus	1995	1999	2001	725.129	1491.23	0.486262	0.63098	773.4	1520.15	0.508767	0.321022	#N/A	0.454107	0.459477	0.448067	489	488	190	0.321022	0.459477	-0.138455	5	0.0886451	0.0253696	0.112284	0.0386647
Euc	Green Triangle 9	South Australia	-37.7392	140.794	1	Benyon, R.G., Theiveyanathan, S. and Doody, T.M., 2006. Australian Journal of Botany, 54(2): 181-192.	E. globulus	1998	2002	2004	744.457	1522.68	0.488912	0.801451	753.633	1535.58	0.490781	0.393337	#N/A	0.441046	0.446097	0.435346	658	604	274	0.393337	0.446097	-0.0527605	8	0.0508134	0.0298107	0.0690498	0.0441054
Euc	Mokobulaan	Sub-Tropical Eastern Drakensberg Mountains, South Afrixa	-25.2833	30.5667	3	Scott, D.F. and Lesch, W., 1997. Journal of Hydrology, 199: 360-377.	E. grandis	1969	1973	1983	945.92	1797.28	0.526308	1.30743	884.236	1780.76	0.496551	0.649204	#N/A	0.445265	0.450419	0.439456	1163.4	1156.07		0.649204	0.450419	0.198785	30	0.000927121	0.0283371	4.76994e-05	0.042309
Euc	Westfalia	Northern Provice, South Africa	-23.7833	30.2	3	Lesch, W. and Scott, D.F., 1997. Forest Ecology and Management, 99: 295-307.	E. grandis	1983	1987	1996	733.664	1913.07	0.383501	0.746933	729.65	1903.26	0.383368	0.286351	#N/A	0.357566	0.360773	0.353865	755.6	545		0.286351	0.360773	-0.0744227	10	0.110493	0.0665546	0.136722	0.0872239
Euc	Florentine Valley 1	Tasmania Australia	-42.6048	146.467	1	Roberts, S., Barton-Johnson, R., McLarin, M. and Read, S., 2015. Forest Ecology and Management, 343: 110-122.	E. nitens	1999	2008	2010	1317.51	1005.11	1.31081	0.73623	1330.2	1012.41	1.3139	0.967333	#N/A	0.800399	0.812749	0.786881	1222.33	979.333	497	0.967333	0.812749	0.154583	20	0.121507	0.0376339	0.0968596	0.0245359
Euc	Florentine Valley 2	Tasmania Australia	-42.6054	146.468	1	Roberts, S., Barton-Johnson, R., McLarin, M. and Read, S., 2015. Forest Ecology and Management, 343: 110-122.	E. nitens	1999	2008	2010	1321.63	1032.08	1.28056	0.457122	1640.7	1011.81	1.62155	0.741248	#N/A	0.85426	0.865997	0.841256	1222.33	750	316	0.741248	0.865997	-0.124748	5	0.0150046	0.0611285	0.0072485	0.0440524
Euc	Florentine Valley 3	Tasmania Australia	-42.601	146.458	1	Roberts, S., Barton-Johnson, R., McLarin, M. and Read, S., 2015. Forest Ecology and Management, 343: 110-122.	E. nitens	2001	2009	2009	1308.99	998.546	1.31089	0.56414	1341.87	1003.99	1.33653	0.75399	#N/A	0.805251	0.817587	0.79174	1259	757	377	0.75399	0.817587	-0.0635971	5	0.0182885	0.0395342	0.00958046	0.0260748
Euc	Florentine Valley 4	Tasmania Australia	-42.601	146.458	1	Roberts, S., Barton-Johnson, R., McLarin, M. and Read, S., 2015. Forest Ecology and Management, 343: 110-122.	E. nitens	2004	2009	2011	1321.63	1032.08	1.28056	0.656685	1222.3	1004	1.21743	0.799469	#N/A	0.777716	0.79005	0.764258	1222.33	802.667	440.333	0.799469	0.79005	0.00941863	7	0.0326575	0.029342	0.0205517	0.0179399
Euc	Grao Mogol	Brazil	-16.5653	-42.8932	2	Lima, W.d.P., Zakia, M.J.B., Libardi, P.L. and Souza Filho, A.P.d., 1990. IPEF International(1): 5-11.	E. urophylla x grandis	1974	1982	1984	1062.69	2008.4	0.529122	0.949754	970.567	2012.22	0.482337	0.458102	#N/A	0.434821	0.439724	0.429282	1121	921.8		0.458102	0.439724	0.0183778	5	0.0258095	0.0320522	0.0392074	0.0468231
Euc	Aracruz, Espirito Santo	Brazil	-19.85	-40.6833	2	Soares, J.V. and Almeida, A.C., 2001. Journal of Hydrology, 253(1-4): 130-147.	E. urophylla x grandis	1986	1995	1996	1158.17	1840.11	0.629403	0.991998	1355.85	1826.49	0.742327	0.736387	#N/A	0.599403	0.608553	0.589377	1396	1345		0.736387	0.608553	0.127834		0.0138373	0.000104081	0.00644437	0.00226168
Euc	Terra Dura, Rio Grande du Sol	Brazil	-30.1769	-51.613	3	Almeida, A.C., Smethurst, P.J., Siggins, A., Cavalcante, R.B.L. and Borges, N., 2016. Hydrological Processes, 30(25): 4687-4703.	E. urophylla x globulus	2002	2002	2014	1476.61	1623.51	0.909515	0.878771	1476.61	1623.51	0.909515	0.799255	#N/A	0.677533	0.688529	0.665565	1626.53	1297.6		0.799255	0.688529	0.110726		0.0325803	0.00486848	0.0204905	0.00105101
Euc	Terra Dura, Rio Grande du Sol	Brazil	-30.5101	-51.613	3	Almeida, A.C., Smethurst, P.J., Siggins, A., Cavalcante, R.B.L. and Borges, N., 2016. Hydrological Processes, 30(25): 4687-4703.	E. urophylla x globulus	2002	2002	2014	1433.28	1602.13	0.894606	0.816212	1433.28	1602.13	0.894606	0.730187	#N/A	0.671346	0.682213	0.659515	1433.14	1169.86		0.730187	0.682213	0.0479749		0.0124172	0.00402686	0.00548745	0.000681336
Euc	Lewisham	Tasmania Australia	-42.8167	147.6	2	Honeysett, J.L., White, D.A., Worledge, D. and Beadle, C.L., 1996. Australian Forestry, 59: 64-73.	E. globulus	1990	1992	1996	846.729	1193.85	0.709242	1.13507	863.38	1182.38	0.730203	0.828834	#N/A	0.592944	0.601927	0.583092	974.545	980		0.828834	0.601927	0.226907		0.0441331	0.000283184	0.0298335	0.00293582
Euc	Lewiaham	Tasmania Australia	-42.8167	147.6	2	Honeysett, J.L., White, D.A., Worledge, D. and Beadle, C.L., 1996. Australian Forestry, 59: 64-73.	E. nitens	1990	1992	1996	846.729	1193.85	0.709242	1.13507	863.38	1182.38	0.730203	0.828834	#N/A	0.592944	0.601927	0.583092	960	980		0.828834	0.601927	0.226907		0.0441331	0.000283184	0.0298335	0.00293582
Euc	Rio Grande du Sol	Brazil	-30.505	-54.1519	3	Reichert, J.M. et al., 2017. Agricultural and Forest Meteorology, 237-238: 282-295.	E. saligna	2005	2012	2013	1373	1608	0.853856	0.691265	1328	1612	0.823821	0.569479	#N/A	0.639952	0.65011	0.628869	2088	918		0.569479	0.65011	-0.080631		0.00242813	0.00098313	0.00750497	3.60029e-05
Euc	North East of Lisbon	Portugal	39.25	-9.25	3	David, J.S., Henriques, M.O., David, T.S., Tomé, J. and Ledger, D.C., 1994. Clearcutting effects on streamflow in coppiced Eucalyptus globulus stands in Portugal. Journal of Hydrology, 162(1): 143-154.	E. globulus	1982	1984	1993	756.6	1101	0.687193	0.972199	777.618	1100.6	0.706541	0.686898	#N/A	0.580009	0.588655	0.570511	788	756		0.686898	0.588655	0.0982431		0.00464347	0.000906014	0.000947895	0.00455021
Euc	North East of Lisbon	Portugal	39.25	-9.25	3	David, J.S., Henriques, M.O., David, T.S., Tomé, J. and Ledger, D.C., 1994. Clearcutting effects on streamflow in coppiced Eucalyptus globulus stands in Portugal. Journal of Hydrology, 162(1): 143-154.	E. globulus	1982	1984	1993	756.6	1101	0.687193	0.983773	777.618	1100.6	0.706541	0.695075	#N/A	0.580009	0.588655	0.570511	788	765		0.695075	0.588655	0.10642		0.0058248	0.000906014	0.00151829	0.00455021
Euc	Nilgiris	South India	11.25	76.75	3	Samraj, P., Sharda, V.N., Chinnamani, S., Lakshmanan, V. and Haldorai, B., 1988. Journal of Hydrology, 103(3): 335-345.	E. globulus	1972	1972	1981	1664	1845	0.901897	0.664663	1664	1845	0.901897	0.599458	#N/A	0.67439	0.685321	0.662491	1568	1106		0.599458	0.685321	-0.0858626	1	0.000372375	0.00443098	0.00320947	0.000853251
Euc	Maria Las Cruces	Arauco, Chile	-37.2542	-73.1876	1	White, D.A. et al., 2021. Forest Ecology and Management, 501: 119676.	E. globulus	1996	2019	2019	1395	1515	0.920792	0.445308	1673	1467	1.14042	0.507839	#N/A	0.757008	0.769215	0.743713	1673	745	450	0.507839	0.769215	-0.261376	1	0.0123023	0.0226382	0.0219843	0.0127927
Euc	Bajo Las Quemas 1	Curanalahue, Chile	-37.5	-73.25	3	Balocchi, F., D. A. White, R. P. Silberstein, P. R. d. Arellano (2020). Forestal Arauco experimental catchments streamflow-rainfall data, HydroShare, http://www.hydroshare.org/resource/4b517deaa07243aa8c46a58646dd4281	E. nitens	2011	2016	2019	1190	1350	0.881481	0.569106	1845	1150	1.60435	0.913043	#N/A	0.851838	0.863626	0.838787	1845	1050		0.913043	0.863626	0.0494177	3	0.0866057	0.0599617	0.0660147	0.0430627
Euc	Bajo Las Quemas 2	Curanalahue, Chile	-37.5	-73.25	3	Balocchi, F., D. A. White, R. P. Silberstein, P. R. d. Arellano (2020). Forestal Arauco experimental catchments streamflow-rainfall data, HydroShare, http://www.hydroshare.org/resource/4b517deaa07243aa8c46a58646dd4281	E. nitens	2011	2016	2019	1190	1350	0.881481	0.509485	1845	1150	1.60435	0.817391	#N/A	0.851838	0.863626	0.838787	1845	940		0.817391	0.863626	-0.0462345	3	0.0394564	0.0599617	0.0260116	0.0430627
Euc	N05	Nacimiento, Chile	-37.25	-72.75	3	Iroumé, A., Jones, J. and Bathurst, J.C., 2021. Hydrological Processes, 35. https://doi.org/10.1002/hyp.14257	E. globulus	2006	2008	2017	959	1587	0.604285	0.745129	1283	1600	0.801875	0.5975	#N/A	0.629512	0.639418	0.618693	1283	956		0.5975	0.639418	-0.0419182	4	0.000451775	0.000426966	0.00343515	0.000278622
Euc	N06	Nacimiento, Chile	-37.25	-72.75	3	Iroumé, A., Jones, J. and Bathurst, J.C., 2021. Hydrological Processes, 35. https://doi.org/10.1002/hyp.14257	E. globulus	2000	2008	2017	959	1587	0.604285	0.860317	1260	1600	0.7875	0.6775	#N/A	0.622484	0.632218	0.611847	1260	1084		0.6775	0.632218	0.0452818	4	0.00345097	0.000181259	0.000457526	0.000570823
Pine	Green Triangle 13	South Australia	-37.7392	140.794	1	Benyon, R.G., Theiveyanathan, S. and Doody, T.M., 2006. Australian Journal of Botany, 54(2): 181-192.		1982	1996	2000	705.747	1496.74	0.471523	0.903917	716.88	1492.34	0.480372	#N/A	0.434217	0.433365	0.438233	0.427862	678	648	395	0.434217	0.427862	0.00635443	8.9	0.0340543	0.03644			0.0115537	0.0129601
Pine	Green Triangle 14	South Australia	-37.7392	140.794	1	Benyon, R.G., Theiveyanathan, S. and Doody, T.M., 2006. Australian Journal of Botany, 54(2): 181-192.	P. radiata	1980	2000	2004	720.12	1505.33	0.478379	1.0086	788.22	1536.62	0.512958	#N/A	0.517371	0.457112	0.462556	0.450993	667	795	410	0.517371	0.450993	0.0663775	8.5	0.0102788	0.0281441			0.000592165	0.00822865
Pine	Green Triangle 15	South Australia	-37.7392	140.794	1	Benyon, R.G., Theiveyanathan, S. and Doody, T.M., 2006. Australian Journal of Botany, 54(2): 181-192.	P. radiata	1975	2000	2004	719.75	1505.51	0.478079	0.805613	788.22	1536.62	0.512958	#N/A	0.413246	0.457112	0.462556	0.450993	724	635	380	0.413246	0.450993	-0.0377474	23	0.0422341	0.0281441			0.0165018	0.00822865
Pine	Green Triangle 16	South Australia	-37.7392	140.794	1	Benyon, R.G., Theiveyanathan, S. and Doody, T.M., 2006. Australian Journal of Botany, 54(2): 181-192.	P. radiata	1978	1999	2003	712.838	1505.57	0.473468	0.715971	754.22	1526.04	0.494232	#N/A	0.353856	0.443572	0.448685	0.437808	600	540	270	0.353856	0.437808	-0.0839517	21	0.0701715	0.032742			0.0352873	0.0107947
Pine	Mokobulaan	Sub-Tropical Eastern Drakensberg Mountains, South Afrixa	-25.2833	30.5667	3	Scott, D.F. and Lesch, W., 1997. Journal of Hydrology, 199: 360-377.	P. patula	1969	1973	1989	992.167	1797.59	0.551942	1.19951	963.135	1786.98	0.538975	#N/A	0.646505	0.475438	0.481341	0.46883	1167.01	1155.29		0.646505	0.46883	0.177674	30	0.000770044	0.0224774			0.010983	0.00531072
Pine	Duke Forest	North Carolina, USA	35.9782	-79.0942	4	Stoy, P.C. et al., 2006. Separating the effects of climate and vegetation on evapotranspiration along a successional chronosequence in the southeastern US. Global Change Biology, 12(11): 2115-2135.	P. taeda	1983	2001	2004	1166.11	1476.12	0.789985	0.577379	1181.2	1476.93	0.799769	#N/A	0.46177	0.628491	0.638373	0.617698	1091.75	682		0.46177	0.617698	-0.155929	0.35	0.0246444	1.11645e-06			0.00638967	0.005775
Pine	Joencheshoek	Western Cape, South Africa	-33.9667	18.9333	3	Lesch, W. and Scott, D.F., 1997. Forest Ecology and Management, 99: 295-307.	P. radiata	1948	1978	1988	634.566	1414.59	0.448585	0.580021	611.955	1423.94	0.429761	#N/A	0.24927	0.394755	0.398739	0.390205	642.878	354.946		0.24927	0.390205	-0.140934	5	0.136519	0.0522352			0.0855179	0.0229523
Pine	Cathedral Peak	Natal, South Africa	-28.9167	29.1333	3	Lesch, W. and Scott, D.F., 1997. Forest Ecology and Management, 99: 295-307.	P. patula	1952	1978	1988	863.411	1632.46	0.528903	0.604839	805.727	1631.52	0.493852	#N/A	0.298701	0.443294	0.4484	0.437537	886.175	487.335		0.298701	0.437537	-0.138836	5	0.102435	0.03284			0.0590512	0.010851
Pine	Grao Mogol	Brazil	-16.5653	-42.8932	2	Lima, W.d.P., Zakia, M.J.B., Libardi, P.L. and Souza Filho, A.P.d., 1990. IPEF International(1): 5-11.	P. caribea var hondurensis	1974	1981	1983	1093.19	2006.58	0.544802	0.653921	1094.93	2004.44	0.546255	#N/A	0.357208	0.480465	0.486496	0.473721	1121	716		0.357208	0.473721	-0.116514		0.068407	0.0210348			0.0340393	0.00462177
Pine	Turkey Creek	South Carolina, USA	33.1333	-79.7833	3	Amatya, D.M., Miwa, M., Harrison, C.A., Trettin, C.C. and Sun, G., 2006. ASABE Paper No. 062182. ASABE, St. Joseph, MI.	P. taeda and P. palustris	1964	1964	1984	1272.95	1529.87	0.832068	0.771858	1272.95	1529.87	0.832068	#N/A	0.642238	0.643787	0.654035	0.632608	1319.38	982.538		0.642238	0.632608	0.00963039		0.000551473	0.000191907			0.010107	0.00826337
Pine	Plymouth	North Carolina, USA	35.8	-76.65	4	Sun, G. et al., 2010. Forest Ecology and Management, 259(7): 1299-1310.	P. taeda	1992	2005	2008	1364.89	1335.89	1.02171	0.79771	1362.65	1337.07	1.01913	#N/A	0.812973	0.718862	0.730608	0.706087	1238	1087		0.812973	0.706087	0.106886		0.0377207	0.00762695			0.0735864	0.0270216
Pine	Gainesville	Florida, USA	29.7333	-82.1583	4	Gholz, H.L. and Clark, K.L., 2002. Agricultural and Forest Meteorology 112: 87–102.	P. taeda	1977	1997	2000	1232.14	1516.21	0.812645	0.871118	1134.17	1548.99	0.732204	#N/A	0.637836	0.594017	0.603029	0.584137	1098	988		0.637836	0.584137	0.0536987		0.000364067	0.00119842			0.00924108	0.00180046
Pine	Gainesville	Florida, USA	29.7333	-82.1583	4	Gholz, H.L. and Clark, K.L., 2002. Agricultural and Forest Meteorology 112: 87–102.	P. taeda	1977	2000	2001	1270.75	1667.85	0.761907	1.02818	1092.22	1676.06	0.651662	#N/A	0.670023	0.548298	0.556106	0.53968	1175.5	1123		0.670023	0.53968	0.130343		0.00262845	0.00625287			0.0164656	4.10078e-06
Pine	Ameriflux Site NC1	North Carolina, USA	35.1833	-76.1833	4	Powell, T.L., Starr, G., Clark, K.L., Martin, T.A. and Gholz, H.L., 2005. Canadian Journal of Forest Research, 35(7): 1568-1580.	P. elliottii and P. palustrius	2002	2006	2009	1269.84	1667.13	0.761691	0.674509	1117.85	1680.78	0.665079	#N/A	0.448602	0.556275	0.564294	0.547435	883	754		0.448602	0.547435	-0.0988328		0.0289521	0.0050866			0.0086682	3.28284e-05
Pine	Ameriflux Site NC2	North Carolina, USA	35.1833	-76.1833	4	Powell, T.L., Starr, G., Clark, K.L., Martin, T.A. and Gholz, H.L., 2005. Canadian Journal of Forest Research, 35(7): 1568-1580.	P. elliottii and P. palustrius	1990	2006	2009	1411.65	1353.62	1.04287	0.765621	1278.7	1376.27	0.929105	#N/A	0.711342	0.685449	0.696605	0.673311	1033	979		0.711342	0.673311	0.0380318		0.00857243	0.00297631			0.0287769	0.01732
Pine	Gympie	Queensland, Australia	-26.0333	152.833	3	Bubb, K.A. and Croton, J.A., 2002.. Hydrological Processes, 16: 105-117.	P. elliottii	1951	1987	1997	1156.9	1754.69	0.659316	1.00478	1123.96	1746.27	0.643635	#N/A	0.64671	0.543456	0.551135	0.534973	1284.4	1129.33		0.64671	0.534973	0.111737		0.000781488	0.00701948			0.0110261	4.53238e-05
Pine	Palhuan	Chile	-35.1	-72	1	Huber, A. and Iroumé, A., 2001. Journal of Hydrology, 248: 78-92.	P. radiata	1990	2002	2003	862.4	1664.78	0.518026	1.00505	946.225	1689.1	0.560194	#N/A	0.563021	0.489966	0.49624	0.482964	1015	951		0.563021	0.482964	0.0800568		0.00310628	0.0184391			0.000454374	0.00345047
Pine	San Ignacio	Chile	-37.2333	-72.3167	1	Huber, A. and Iroumé, A., 2001. Journal of Hydrology, 248: 78-92.	P. radiata	1985	1999	2001	1306.77	1655.9	0.789162	0.602553	1425.6	1645.9	0.866152	#N/A	0.521903	0.659134	0.669735	0.647585	1138	859		0.521903	0.647585	-0.125682		0.00938033	0.000831162			0.000392123	0.0112106
Pine	Porvenir	Chile	-37.9167	-72.4167	1	Huber, A. and Iroumé, A., 2001. Journal of Hydrology, 248: 78-92.	P. radiata	1987	1999	2000	1313.22	1652.39	0.794737	0.693743	1425.6	1645.9	0.866152	#N/A	0.600887	0.659134	0.669735	0.647585	1189	989		0.600887	0.647585	-0.0466979		0.000319265	0.000831162			0.00350252	0.0112106
Pine	Huape	Chile	-39.8	-73.2333	1	Huber, A. and Iroumé, A., 2001. Journal of Hydrology, 248: 78-92.	P. radiata	1986	1999	2000	1258.64	1399.73	0.8992	0.742438	1309.2	1411.58	0.927474	#N/A	0.688592	0.684799	0.695942	0.672674	2081	972		0.688592	0.672674	0.0159174		0.00487718	0.00290731			0.0215758	0.017153
Pine	Croppers	Victoria, Australia	-36.55	146.75	3	Bren, L. and Hopmans, P., 2007. Journal of Hydrology, 336: 416–429.	P. radiata	1980	1997	2006	1400.25	1100	1.27295	0.61618	1400.25	1100	1.27295	#N/A	0.784369	0.791181	0.803542	0.777671	1400.25	862.806		0.784369	0.777671	0.00669799		0.0274281	0.0252544			0.058886	0.0556801
Pine	Lidsdale, Central Tablelands	NSW, Australia	-32.33	150.08	3	Putuhena, W.M. and Cordery, I., 2000. Agricultural and Forest Meteorology, 100.	P. radiata	1978	1978	1993	737.844	1450	0.508858	0.897836	737.844	1450	0.508858	#N/A	0.456871	0.454172	0.459544	0.448131	737.844	662.462		0.456871	0.448131	0.00874001		0.0262065	0.0291127			0.00719686	0.00875615
Pine	Coweeta	North Carolina, USA	35.25	-83.25	3	Ford, C.R., Hubbard, R.M., Kloeppel, B.D. and Vose, J.M., 2007.. Agricultural and Forest Meteorology, 145(3): 176-185.	P. strobus	1956	2004	2005	1604.29	1467.11	1.0935	0.805993	1601.75	1432.18	1.1184	#N/A	0.901422	0.750611	0.76276	0.737385	2240	1291	706	0.901422	0.737385	0.164037		0.0799003	0.0140731			0.129396	0.0382906
Pine	Puruki	New Zealand	-39.4	176.24	3	Beets, P.N. and Oliver, G.R., 2006.New Zealand Journal of Forest Science, 37(2): 308-323.	P. radiata	1973	1973	2000	1512	1304	1.15951	0.681217	1512	1304	1.15951	#N/A	0.789877	0.762375	0.774624	0.749029	1554	1030		0.789877	0.749029	0.0408485		0.0292828	0.0169713			0.0615895	0.0429832
Pine	Maria Las Cruces	Arauco, Chile	-37.2542	-73.1876	1	White, D.A. et al., 2021. Forest Ecology and Management, 501: 119676.	P. radiata	1996	2017	2020	1395	1515	0.920792	0.43694	1673	1467	1.14042	#N/A	0.498296	0.757008	0.769215	0.743713	1673	731	465	0.498296	0.743713	-0.245417	1	0.0145104	0.0156144			0.00188435	0.0408072
Pine	Quivolgo	Constitucion, Chile	-35.3891	-72.22	3	White, D.A. et al., 2021. Forest Ecology and Management, 501: 119676.	P. radiata	2003	2016	2017	1016	1855	0.547709	0.860817	661	1781	0.37114	#N/A	0.319483	0.347487	0.350497	0.344003	661	569	377	0.319483	0.344003	-0.0245192	0.5	0.0895635	0.0754889			0.0493824	0.0390862
Pine	San Gabriel 1	Valdivia, Chile	-39.91	-73.1	3	Balocchi, F., D. A. White, R. P. Silberstein, P. R. d. Arellano (2020). Forestal Arauco experimental catchments streamflow-rainfall data, HydroShare, http://www.hydroshare.org/resource/4b517deaa07243aa8c46a58646dd4281	P. radiata	1990	2012	2017	2210	1110	1.99099	0.509694	1960	1080	1.81481	#N/A	0.925	0.877883	0.888979	0.865484	1960	999		0.925	0.865484	0.0595161	1.5	0.093786	0.0608752			0.146915	0.104833
Pine	San Gabriel 2	Valdivia, Chile	-39.91	-73.1	3	Balocchi, F., D. A. White, R. P. Silberstein, P. R. d. Arellano (2020). Forestal Arauco experimental catchments streamflow-rainfall data, HydroShare, http://www.hydroshare.org/resource/4b517deaa07243aa8c46a58646dd4281	P. radiata	1990	2012	2017	2210	1110	1.99099	0.460204	1960	1080	1.81481	#N/A	0.835185	0.877883	0.888979	0.865484	1960	902		0.835185	0.865484	-0.0302988	1.5	0.046842	0.0608752			0.0861306	0.104833
Pine	N01	Nacimiento, Chile	-37.25	-72.75	3	Iroumé, A., Jones, J. and Bathurst, J.C., 2021. . Hydrological Processes, 35. https://doi.org/10.1002/hyp.14257	P. radiata	1987	2008	2017	959	1587	0.604285	0.813679	1272	1600	0.795	#N/A	0.646875	0.62617	0.635994	0.615436	1272	1035		0.646875	0.615436		4	0.000790734	1.10132e-05			0.0110607	0.00543632
Pine	N02	Nacimiento, Chile	-37.25	-72.75	3	Iroumé, A., Jones, J. and Bathurst, J.C., 2021. . Hydrological Processes, 35. https://doi.org/10.1002/hyp.14257	P. radiata	1987	2008	2017	959	1587	0.604285	0.813178	1290	1600	0.80625	#N/A	0.655625	0.63162	0.641578	0.620748	1290	1049		0.655625	0.620748		4	0.0013594	3.97007e-06			0.0129778	0.00624772
																	CWI			All	Euc	Pine	Euc/Pine
R stats output																	0.01			0.00999879	0.00999927	0.00999799	1.00013
> nonlin1<-nls(k.actual~1+CWI-(1+(CWI^w))^(1/w), y, start = startvals)																	0.1			0.0993363	0.099494	0.0991282	1.00369
> nonlin1																	0.2			0.19558	0.196382	0.194593	1.00919
Nonlinear regression model																	0.3			0.286679	0.288629	0.284375	1.01496
model: k.actual ~ 1 + CWI - (1 + (CWI^w))^(1/w)																	0.4			0.371091	0.374572	0.36709	1.02038
data: y																	0.5			0.447774	0.452989	0.4419	1.02509
w																	0.6			0.516205	0.523163	0.50848	1.02888
2.74																	0.7			0.576356	0.584906	0.566959	1.03166
residual sum-of-squares: 0.6921																	0.8			0.628604	0.638488	0.617808	1.03347
																	0.9			0.673601	0.684515	0.66172	1.03445
Number of iterations to convergence: 3																	1			0.712151	0.723791	0.699492	1.03474
Achieved convergence tolerance: 4.55e-07																	1.1			0.745095	0.757187	0.731935	1.0345
> mm <- model.matrix(~ 0 + Genus, y)																	1.2			0.773245	0.785559	0.759813	1.03388
> nonlin2<-nls(k.actual~1+CWI-(1+(CWI^drop(mm %*% c(w1,w2))))^(1/drop(mm %*% c(w1,w2))), y, start = c(w1=1.5,w2=1.5), trace = TRUE)																	1.3			0.797334	0.809691	0.783817	1.03301
4.547248 : 1.5 1.5																	1.4			0.818008	0.830269	0.804546	1.03197
1.136395 : 2.114137 2.062902																	1.5			0.835814	0.84788	0.822514	1.03084
0.7091052 : 2.620344 2.483477																	1.6			0.851217	0.863017	0.838154	1.02966
0.6867222 : 2.821092 2.625566																	1.7			0.864599	0.876088	0.851826	1.02848
0.6865736 : 2.841686 2.637655																	1.8			0.87628	0.887428	0.863831	1.02732
0.6865736 : 2.841802 2.637814																	1.9			0.886524	0.897316	0.87442	1.02618
> nonlin2																	2			0.895548	0.905977	0.8838	1.02509
Nonlinear regression model																	2.5			0.927728	0.936431	0.917725	1.02038
model: k.actual ~ 1 + CWI - (1 + (CWI^drop(mm %*% c(w1, w2))))^(1/drop(mm %*% c(w1, w2)))																				0	0
data: y																				1	1
w1 w2																				2.5	1
2.842 2.638
residual sum-of-squares: 0.6866
																														1.78
Number of iterations to convergence: 5																														1.81
Achieved convergence tolerance: 8.119e-07																														1.82
> anova(nonlin1,nonlin2) #does the group factor have a significantly different b (const) term?																														1.84
Analysis of Variance Table
Model 1: k.actual ~ 1 + CWI - (1 + (CWI^w))^(1/w)
Model 2: k.actual ~ 1 + CWI - (1 + (CWI^drop(mm %*% c(w1, w2))))^(1/drop(mm %*% c(w1, w2)))
Res.Df Res.Sum Sq Df Sum Sq F value Pr(>F)
1 56 0.69213
2 55 0.68657 1 0.00556 0.4454 0.5073
>

## Sheet: ET and VEE vs P
									This data is CRU climate data and calculations (see paper for reference)														This section coloured green is measured values from the papers
																				All	Euc	Pine
			Location (Decimal Degrees)						Measurements		Plantation Life (from CRU Data, see paper for reference)				Measurement Period				w:	2.74	2.842	2.638
Genus	Site Name	Location	Latitude	Longitude	Method	Reference	Species	Planted	Commenced	Ended	Rain	PET	CWI plantation life	ET/Rain	Rain	PET	CWI measurement period	k actual euc	kactual pine	VEE-predicted-all	VEE-predicted	VEE-predicted	Rain (Papers)	ET	T	VEE actual	VEE pred	Residual	Soil Depth								log residual
Euc	Jijou	Leizhou Peninsula, China	20.9	109.867	1	Lane, P.N.J. et al., 2004. Agricultural and Forest Meteorology, 124(3-4): 253-267.	E. urophylla	1996	2009	2011	2038.98	1478.16	1.37941	0.518116	2188.7	1461.7	1.49736	0.775808	#N/A	0.835378	0.84745	0.822072	1620	1134	533.5	0.775808	0.84745	-0.0716416	3.5
Euc	Hetou	Leizhou Peninsula, China	21.0833	109.9	1	Lane, P.N.J. et al., 2004. Agricultural and Forest Meteorology, 124(3-4): 253-267.	E. urophylla	1996	2009	2011	1821.27	1402.71	1.29839	0.526269	1892.57	1384.42	1.36705	0.719436	#N/A	0.811537	0.823843	0.798044	1920.3	996	522	0.719436	0.823843	-0.104406	3.5
Euc	Qipo	Guangxi Provice, China	22.6864	108.196	1	Ren, S. et al., 2019. Australian Forestry: 1-14.	E. urophylla	2010	2014	2015	1447.07	1347.42	1.07396	0.574601	1494.95	1359.75	1.09943	0.631732	#N/A	0.744921	0.757011	0.731763	1294	859	332.5	0.631732	0.757011	-0.125279	1
Euc	Green Triangle 6	South Australia	-37.7392	140.794	1	Benyon, R.G., Theiveyanathan, S. and Doody, T.M., 2006. Australian Journal of Botany, 54(2): 181-192.	E. globulus	1998	2002	2005	731.125	1526.51	0.478953	0.983889	724.675	1540.01	0.470566	0.462985	#N/A	0.426046	0.430742	0.42073	701	713	402	0.462985	0.430742	0.0322431	10																		18.6
Euc	Green Triangle 8	South Australia	-37.7392	140.794	1	Benyon, R.G., Theiveyanathan, S. and Doody, T.M., 2006. Australian Journal of Botany, 54(2): 181-192.	E. globulus	1995	1999	2001	725.129	1491.23	0.486262	0.63098	773.4	1520.15	0.508767	0.321022	#N/A	0.454107	0.459477	0.448067	489	488	190	0.321022	0.459477	-0.138455	5
Euc	Green Triangle 9	South Australia	-37.7392	140.794	1	Benyon, R.G., Theiveyanathan, S. and Doody, T.M., 2006. Australian Journal of Botany, 54(2): 181-192.	E. globulus	1998	2002	2004	744.457	1522.68	0.488912	0.801451	753.633	1535.58	0.490781	0.393337	#N/A	0.441046	0.446097	0.435346	658	604	274	0.393337	0.446097	-0.0527605	8
Euc	Mokobulaan	Sub-Tropical Eastern Drakensberg Mountains, South Afrixa	-25.2833	30.5667	3	Scott, D.F. and Lesch, W., 1997. Journal of Hydrology, 199: 360-377.	E. grandis	1969	1973	1983	945.92	1797.28	0.526308	1.30743	884.236	1780.76	0.496551	0.649204	#N/A	0.445265	0.450419	0.439456	1163.4	1156.07		0.649204	0.450419	0.198785	30
Euc	Westfalia	Northern Provice, South Africa	-23.7833	30.2	3	Lesch, W. and Scott, D.F., 1997. Forest Ecology and Management, 99: 295-307.	E. grandis	1983	1987	1996	733.664	1913.07	0.383501	0.746933	729.65	1903.26	0.383368	0.286351	#N/A	0.357566	0.360773	0.353865	755.6	545		0.286351	0.360773	-0.0744227	10
Euc	Florentine Valley 1	Tasmania Australia	-42.6048	146.467	1	Roberts, S., Barton-Johnson, R., McLarin, M. and Read, S., 2015. Forest Ecology and Management, 343: 110-122.	E. nitens	1999	2008	2010	1317.51	1005.11	1.31081	0.73623	1330.2	1012.41	1.3139	0.967333	#N/A	0.800399	0.812749	0.786881	1222.33	979.333	497	0.967333	0.812749	0.154583	20
Euc	Florentine Valley 2	Tasmania Australia	-42.6054	146.468	1	Roberts, S., Barton-Johnson, R., McLarin, M. and Read, S., 2015. Forest Ecology and Management, 343: 110-122.	E. nitens	1999	2008	2010	1321.63	1032.08	1.28056	0.457122	1640.7	1011.81	1.62155	0.741248	#N/A	0.85426	0.865997	0.841256	1222.33	750	316	0.741248	0.865997	-0.124748	5
Euc	Florentine Valley 3	Tasmania Australia	-42.601	146.458	1	Roberts, S., Barton-Johnson, R., McLarin, M. and Read, S., 2015. Forest Ecology and Management, 343: 110-122.	E. nitens	2001	2009	2009	1308.99	998.546	1.31089	0.56414	1341.87	1003.99	1.33653	0.75399	#N/A	0.805251	0.817587	0.79174	1259	757	377	0.75399	0.817587	-0.0635971	5
Euc	Florentine Valley 4	Tasmania Australia	-42.601	146.458	1	Roberts, S., Barton-Johnson, R., McLarin, M. and Read, S., 2015. Forest Ecology and Management, 343: 110-122.	E. nitens	2004	2009	2011	1321.63	1032.08	1.28056	0.656685	1222.3	1004	1.21743	0.799469	#N/A	0.777716	0.79005	0.764258	1222.33	802.667	440.333	0.799469	0.79005	0.00941863	7
Euc	Grao Mogol	Brazil	-16.5653	-42.8932	2	Lima, W.d.P., Zakia, M.J.B., Libardi, P.L. and Souza Filho, A.P.d., 1990. IPEF International(1): 5-11.	E. urophylla x grandis	1974	1982	1984	1062.69	2008.4	0.529122	0.949754	970.567	2012.22	0.482337	0.458102	#N/A	0.434821	0.439724	0.429282	1121	921.8		0.458102	0.439724	0.0183778	5
Euc	Aracruz, Espirito Santo	Brazil	-19.85	-40.6833	2	Soares, J.V. and Almeida, A.C., 2001. Journal of Hydrology, 253(1-4): 130-147.	E. urophylla x grandis	1986	1995	1996	1158.17	1840.11	0.629403	0.991998	1355.85	1826.49	0.742327	0.736387	#N/A	0.599403	0.608553	0.589377	1396	1345		0.736387	0.608553	0.127834
Euc	Terra Dura, Rio Grande du Sol	Brazil	-30.1769	-51.613	3	Almeida, A.C., Smethurst, P.J., Siggins, A., Cavalcante, R.B.L. and Borges, N., 2016. Hydrological Processes, 30(25): 4687-4703.	E. urophylla x globulus	2002	2002	2014	1476.61	1623.51	0.909515	0.878771	1476.61	1623.51	0.909515	0.799255	#N/A	0.677533	0.688529	0.665565	1626.53	1297.6		0.799255	0.688529	0.110726
Euc	Terra Dura, Rio Grande du Sol	Brazil	-30.5101	-51.613	3	Almeida, A.C., Smethurst, P.J., Siggins, A., Cavalcante, R.B.L. and Borges, N., 2016. Hydrological Processes, 30(25): 4687-4703.	E. urophylla x globulus	2002	2002	2014	1433.28	1602.13	0.894606	0.816212	1433.28	1602.13	0.894606	0.730187	#N/A	0.671346	0.682213	0.659515	1433.14	1169.86		0.730187	0.682213	0.0479749
Euc	Lewisham	Tasmania Australia	-42.8167	147.6	2	Honeysett, J.L., White, D.A., Worledge, D. and Beadle, C.L., 1996. Australian Forestry, 59: 64-73.	E. globulus	1990	1992	1996	846.729	1193.85	0.709242	1.13507	863.38	1182.38	0.730203	0.828834	#N/A	0.592944	0.601927	0.583092	974.545	980		0.828834	0.601927	0.226907
Euc	Lewiaham	Tasmania Australia	-42.8167	147.6	2	Honeysett, J.L., White, D.A., Worledge, D. and Beadle, C.L., 1996. Australian Forestry, 59: 64-73.	E. nitens	1990	1992	1996	846.729	1193.85	0.709242	1.13507	863.38	1182.38	0.730203	0.828834	#N/A	0.592944	0.601927	0.583092	960	980		0.828834	0.601927	0.226907
Euc	Rio Grande du Sol	Brazil	-30.505	-54.1519	3	Reichert, J.M. et al., 2017. Agricultural and Forest Meteorology, 237-238: 282-295.	E. saligna	2005	2012	2013	1373	1608	0.853856	0.691265	1328	1612	0.823821	0.569479	#N/A	0.639952	0.65011	0.628869	2088	918		0.569479	0.65011	-0.080631
Euc	North East of Lisbon	Portugal	39.25	-9.25	3	David, J.S., Henriques, M.O., David, T.S., Tomé, J. and Ledger, D.C., 1994. Clearcutting effects on streamflow in coppiced Eucalyptus globulus stands in Portugal. Journal of Hydrology, 162(1): 143-154.	E. globulus	1982	1984	1993	756.6	1101	0.687193	0.972199	777.618	1100.6	0.706541	0.686898	#N/A	0.580009	0.588655	0.570511	788	756		0.686898	0.588655	0.0982431
Euc	North East of Lisbon	Portugal	39.25	-9.25	3	David, J.S., Henriques, M.O., David, T.S., Tomé, J. and Ledger, D.C., 1994. Clearcutting effects on streamflow in coppiced Eucalyptus globulus stands in Portugal. Journal of Hydrology, 162(1): 143-154.	E. globulus	1982	1984	1993	756.6	1101	0.687193	0.983773	777.618	1100.6	0.706541	0.695075	#N/A	0.580009	0.588655	0.570511	788	765		0.695075	0.588655	0.10642
Euc	Nilgiris	South India	11.25	76.75	3	Samraj, P., Sharda, V.N., Chinnamani, S., Lakshmanan, V. and Haldorai, B., 1988. Journal of Hydrology, 103(3): 335-345.	E. globulus	1972	1972	1981	1664	1845	0.901897	0.664663	1664	1845	0.901897	0.599458	#N/A	0.67439	0.685321	0.662491	1568	1106		0.599458	0.685321	-0.0858626	1
Euc	Maria Las Cruces	Arauco, Chile	-37.2542	-73.1876	1	White, D.A. et al., 2021. Forest Ecology and Management, 501: 119676.	E. globulus	1996	2019	2019	1395	1515	0.920792	0.445308	1673	1467	1.14042	0.507839	#N/A	0.757008	0.769215	0.743713	1673	745	450	0.507839	0.769215	-0.261376	1
Euc	Bajo Las Quemas 1	Curanalahue, Chile	-37.5	-73.25	3	Balocchi, F., D. A. White, R. P. Silberstein, P. R. d. Arellano (2020). Forestal Arauco experimental catchments streamflow-rainfall data, HydroShare, http://www.hydroshare.org/resource/4b517deaa07243aa8c46a58646dd4281	E. nitens	2011	2016	2019	1190	1350	0.881481	0.569106	1845	1150	1.60435	0.913043	#N/A	0.851838	0.863626	0.838787	1845	1050		0.913043	0.863626	0.0494177	3
Euc	Bajo Las Quemas 2	Curanalahue, Chile	-37.5	-73.25	3	Balocchi, F., D. A. White, R. P. Silberstein, P. R. d. Arellano (2020). Forestal Arauco experimental catchments streamflow-rainfall data, HydroShare, http://www.hydroshare.org/resource/4b517deaa07243aa8c46a58646dd4281	E. nitens	2011	2016	2019	1190	1350	0.881481	0.509485	1845	1150	1.60435	0.817391	#N/A	0.851838	0.863626	0.838787	1845	940		0.817391	0.863626	-0.0462345	3
Euc	N05	Nacimiento, Chile	-37.25	-72.75	3	Iroumé, A., Jones, J. and Bathurst, J.C., 2021. Hydrological Processes, 35. https://doi.org/10.1002/hyp.14257	E. globulus	2006	2008	2017	959	1587	0.604285	0.745129	1283	1600	0.801875	0.5975	#N/A	0.629512	0.639418	0.618693	1283	956		0.5975	0.639418	-0.0419182	4
Euc	N06	Nacimiento, Chile	-37.25	-72.75	3	Iroumé, A., Jones, J. and Bathurst, J.C., 2021. Hydrological Processes, 35. https://doi.org/10.1002/hyp.14257	E. globulus	2000	2008	2017	959	1587	0.604285	0.860317	1260	1600	0.7875	0.6775	#N/A	0.622484	0.632218	0.611847	1260	1084		0.6775	0.632218	0.0452818	4
Pine	Green Triangle 13	South Australia	-37.7392	140.794	1	Benyon, R.G., Theiveyanathan, S. and Doody, T.M., 2006. Australian Journal of Botany, 54(2): 181-192.		1982	1996	2000	705.747	1496.74	0.471523	0.903917	716.88	1492.34	0.480372	#N/A	0.434217	0.433365	0.438233	0.427862	678	648	395	0.434217	0.427862	0.00635443	8.9
Pine	Green Triangle 14	South Australia	-37.7392	140.794	1	Benyon, R.G., Theiveyanathan, S. and Doody, T.M., 2006. Australian Journal of Botany, 54(2): 181-192.	P. radiata	1980	2000	2004	720.12	1505.33	0.478379	1.0086	788.22	1536.62	0.512958	#N/A	0.517371	0.457112	0.462556	0.450993	667	795	410	0.517371	0.450993	0.0663775	8.5
Pine	Green Triangle 15	South Australia	-37.7392	140.794	1	Benyon, R.G., Theiveyanathan, S. and Doody, T.M., 2006. Australian Journal of Botany, 54(2): 181-192.	P. radiata	1975	2000	2004	719.75	1505.51	0.478079	0.805613	788.22	1536.62	0.512958	#N/A	0.413246	0.457112	0.462556	0.450993	724	635	380	0.413246	0.450993	-0.0377474	23
Pine	Green Triangle 16	South Australia	-37.7392	140.794	1	Benyon, R.G., Theiveyanathan, S. and Doody, T.M., 2006. Australian Journal of Botany, 54(2): 181-192.	P. radiata	1978	1999	2003	712.838	1505.57	0.473468	0.715971	754.22	1526.04	0.494232	#N/A	0.353856	0.443572	0.448685	0.437808	600	540	270	0.353856	0.437808	-0.0839517	21
Pine	Mokobulaan	Sub-Tropical Eastern Drakensberg Mountains, South Afrixa	-25.2833	30.5667	3	Scott, D.F. and Lesch, W., 1997. Journal of Hydrology, 199: 360-377.	P. patula	1969	1973	1989	992.167	1797.59	0.551942	1.19951	963.135	1786.98	0.538975	#N/A	0.646505	0.475438	0.481341	0.46883	1167.01	1155.29		0.646505	0.46883	0.177674	30
Pine	Duke Forest	North Carolina, USA	35.9782	-79.0942	4	Stoy, P.C. et al., 2006. Separating the effects of climate and vegetation on evapotranspiration along a successional chronosequence in the southeastern US. Global Change Biology, 12(11): 2115-2135.	P. taeda	1983	2001	2004	1166.11	1476.12	0.789985	0.577379	1181.2	1476.93	0.799769	#N/A	0.46177	0.628491	0.638373	0.617698	1091.75	682		0.46177	0.617698	-0.155929	0.35
Pine	Joencheshoek	Western Cape, South Africa	-33.9667	18.9333	3	Lesch, W. and Scott, D.F., 1997. Forest Ecology and Management, 99: 295-307.	P. radiata	1948	1978	1988	634.566	1414.59	0.448585	0.580021	611.955	1423.94	0.429761	#N/A	0.24927	0.394755	0.398739	0.390205	642.878	354.946		0.24927	0.390205	-0.140934	5
Pine	Cathedral Peak	Natal, South Africa	-28.9167	29.1333	3	Lesch, W. and Scott, D.F., 1997. Forest Ecology and Management, 99: 295-307.	P. patula	1952	1978	1988	863.411	1632.46	0.528903	0.604839	805.727	1631.52	0.493852	#N/A	0.298701	0.443294	0.4484	0.437537	886.175	487.335		0.298701	0.437537	-0.138836	5
Pine	Grao Mogol	Brazil	-16.5653	-42.8932	2	Lima, W.d.P., Zakia, M.J.B., Libardi, P.L. and Souza Filho, A.P.d., 1990. IPEF International(1): 5-11.	P. caribea var hondurensis	1974	1981	1983	1093.19	2006.58	0.544802	0.653921	1094.93	2004.44	0.546255	#N/A	0.357208	0.480465	0.486496	0.473721	1121	716		0.357208	0.473721	-0.116514
Pine	Turkey Creek	South Carolina, USA	33.1333	-79.7833	3	Amatya, D.M., Miwa, M., Harrison, C.A., Trettin, C.C. and Sun, G., 2006. ASABE Paper No. 062182. ASABE, St. Joseph, MI.	P. taeda and P. palustris	1964	1964	1984	1272.95	1529.87	0.832068	0.771858	1272.95	1529.87	0.832068	#N/A	0.642238	0.643787	0.654035	0.632608	1319.38	982.538		0.642238	0.632608	0.00963039
Pine	Plymouth	North Carolina, USA	35.8	-76.65	4	Sun, G. et al., 2010. Forest Ecology and Management, 259(7): 1299-1310.	P. taeda	1992	2005	2008	1364.89	1335.89	1.02171	0.79771	1362.65	1337.07	1.01913	#N/A	0.812973	0.718862	0.730608	0.706087	1238	1087		0.812973	0.706087	0.106886
Pine	Gainesville	Florida, USA	29.7333	-82.1583	4	Gholz, H.L. and Clark, K.L., 2002. Agricultural and Forest Meteorology 112: 87–102.	P. taeda	1977	1997	2000	1232.14	1516.21	0.812645	0.871118	1134.17	1548.99	0.732204	#N/A	0.637836	0.594017	0.603029	0.584137	1098	988		0.637836	0.584137	0.0536987
Pine	Gainesville	Florida, USA	29.7333	-82.1583	4	Gholz, H.L. and Clark, K.L., 2002. Agricultural and Forest Meteorology 112: 87–102.	P. taeda	1977	2000	2001	1270.75	1667.85	0.761907	1.02818	1092.22	1676.06	0.651662	#N/A	0.670023	0.548298	0.556106	0.53968	1175.5	1123		0.670023	0.53968	0.130343
Pine	Ameriflux Site NC1	North Carolina, USA	35.1833	-76.1833	4	Powell, T.L., Starr, G., Clark, K.L., Martin, T.A. and Gholz, H.L., 2005. Canadian Journal of Forest Research, 35(7): 1568-1580.	P. elliottii and P. palustrius	2002	2006	2009	1269.84	1667.13	0.761691	0.674509	1117.85	1680.78	0.665079	#N/A	0.448602	0.556275	0.564294	0.547435	883	754		0.448602	0.547435	-0.0988328
Pine	Ameriflux Site NC2	North Carolina, USA	35.1833	-76.1833	4	Powell, T.L., Starr, G., Clark, K.L., Martin, T.A. and Gholz, H.L., 2005. Canadian Journal of Forest Research, 35(7): 1568-1580.	P. elliottii and P. palustrius	1990	2006	2009	1411.65	1353.62	1.04287	0.765621	1278.7	1376.27	0.929105	#N/A	0.711342	0.685449	0.696605	0.673311	1033	979		0.711342	0.673311	0.0380318
Pine	Gympie	Queensland, Australia	-26.0333	152.833	3	Bubb, K.A. and Croton, J.A., 2002.. Hydrological Processes, 16: 105-117.	P. elliottii	1951	1987	1997	1156.9	1754.69	0.659316	1.00478	1123.96	1746.27	0.643635	#N/A	0.64671	0.543456	0.551135	0.534973	1284.4	1129.33		0.64671	0.534973	0.111737
Pine	Palhuan	Chile	-35.1	-72	1	Huber, A. and Iroumé, A., 2001. Journal of Hydrology, 248: 78-92.	P. radiata	1990	2002	2003	862.4	1664.78	0.518026	1.00505	946.225	1689.1	0.560194	#N/A	0.563021	0.489966	0.49624	0.482964	1015	951		0.563021	0.482964	0.0800568
Pine	San Ignacio	Chile	-37.2333	-72.3167	1	Huber, A. and Iroumé, A., 2001. Journal of Hydrology, 248: 78-92.	P. radiata	1985	1999	2001	1306.77	1655.9	0.789162	0.602553	1425.6	1645.9	0.866152	#N/A	0.521903	0.659134	0.669735	0.647585	1138	859		0.521903	0.647585	-0.125682
Pine	Porvenir	Chile	-37.9167	-72.4167	1	Huber, A. and Iroumé, A., 2001. Journal of Hydrology, 248: 78-92.	P. radiata	1987	1999	2000	1313.22	1652.39	0.794737	0.693743	1425.6	1645.9	0.866152	#N/A	0.600887	0.659134	0.669735	0.647585	1189	989		0.600887	0.647585	-0.0466979
Pine	Huape	Chile	-39.8	-73.2333	1	Huber, A. and Iroumé, A., 2001. Journal of Hydrology, 248: 78-92.	P. radiata	1986	1999	2000	1258.64	1399.73	0.8992	0.742438	1309.2	1411.58	0.927474	#N/A	0.688592	0.684799	0.695942	0.672674	2081	972		0.688592	0.672674	0.0159174
Pine	Croppers	Victoria, Australia	-36.55	146.75	3	Bren, L. and Hopmans, P., 2007. Journal of Hydrology, 336: 416–429.	P. radiata	1980	1997	2006	1400.25	1100	1.27295	0.61618	1400.25	1100	1.27295	#N/A	0.784369	0.791181	0.803542	0.777671	1400.25	862.806		0.784369	0.777671	0.00669799
Pine	Lidsdale, Central Tablelands	NSW, Australia	-32.33	150.08	3	Putuhena, W.M. and Cordery, I., 2000. Agricultural and Forest Meteorology, 100.	P. radiata	1978	1978	1993	737.844	1450	0.508858	0.897836	737.844	1450	0.508858	#N/A	0.456871	0.454172	0.459544	0.448131	737.844	662.462		0.456871	0.448131	0.00874001
Pine	Coweeta	North Carolina, USA	35.25	-83.25	3	Ford, C.R., Hubbard, R.M., Kloeppel, B.D. and Vose, J.M., 2007.. Agricultural and Forest Meteorology, 145(3): 176-185.	P. strobus	1956	2004	2005	1604.29	1467.11	1.0935	0.805993	1601.75	1432.18	1.1184	#N/A	0.901422	0.750611	0.76276	0.737385	2240	1291	706	0.901422	0.737385	0.164037
Pine	Puruki	New Zealand	-39.4	176.24	3	Beets, P.N. and Oliver, G.R., 2006.New Zealand Journal of Forest Science, 37(2): 308-323.	P. radiata	1973	1973	2000	1512	1304	1.15951	0.681217	1512	1304	1.15951	#N/A	0.789877	0.762375	0.774624	0.749029	1554	1030		0.789877	0.749029	0.0408485
Pine	Maria Las Cruces	Arauco, Chile	-37.2542	-73.1876	1	White, D.A. et al., 2021. Forest Ecology and Management, 501: 119676.	P. radiata	1996	2017	2020	1395	1515	0.920792	0.43694	1673	1467	1.14042	#N/A	0.498296	0.757008	0.769215	0.743713	1673	731	465	0.498296	0.743713	-0.245417	1
Pine	Quivolgo	Constitucion, Chile	-35.3891	-72.22	3	White, D.A. et al., 2021. Forest Ecology and Management, 501: 119676.	P. radiata	2003	2016	2017	1016	1855	0.547709	0.860817	661	1781	0.37114	#N/A	0.319483	0.347487	0.350497	0.344003	661	569	377	0.319483	0.344003	-0.0245192	0.5
Pine	San Gabriel 1	Valdivia, Chile	-39.91	-73.1	3	Balocchi, F., D. A. White, R. P. Silberstein, P. R. d. Arellano (2020). Forestal Arauco experimental catchments streamflow-rainfall data, HydroShare, http://www.hydroshare.org/resource/4b517deaa07243aa8c46a58646dd4281	P. radiata	1990	2012	2017	2210	1110	1.99099	0.509694	1960	1080	1.81481	#N/A	0.925	0.877883	0.888979	0.865484	1960	999		0.925	0.865484	0.0595161	1.5
Pine	San Gabriel 2	Valdivia, Chile	-39.91	-73.1	3	Balocchi, F., D. A. White, R. P. Silberstein, P. R. d. Arellano (2020). Forestal Arauco experimental catchments streamflow-rainfall data, HydroShare, http://www.hydroshare.org/resource/4b517deaa07243aa8c46a58646dd4281	P. radiata	1990	2012	2017	2210	1110	1.99099	0.460204	1960	1080	1.81481	#N/A	0.835185	0.877883	0.888979	0.865484	1960	902		0.835185	0.865484	-0.0302988	1.5
Pine	N01	Nacimiento, Chile	-37.25	-72.75	3	Iroumé, A., Jones, J. and Bathurst, J.C., 2021. . Hydrological Processes, 35. https://doi.org/10.1002/hyp.14257	P. radiata	1987	2008	2017	959	1587	0.604285	0.813679	1272	1600	0.795	#N/A	0.646875	0.62617	0.635994	0.615436	1272	1035		0.646875	0.615436		4
Pine	N02	Nacimiento, Chile	-37.25	-72.75	3	Iroumé, A., Jones, J. and Bathurst, J.C., 2021. . Hydrological Processes, 35. https://doi.org/10.1002/hyp.14257	P. radiata	1987	2008	2017	959	1587	0.604285	0.813178	1290	1600	0.80625	#N/A	0.655625	0.63162	0.641578	0.620748	1290	1049		0.655625	0.620748		4
																	CWI			All	Euc	Pine	Euc/Pine
R stats output																	0.01			0.00999879	0.00999927	0.00999799	1.00013
> #Update 20220809 - responding to comments from Mike Ryan to explore ET vs P																	0.1			0.0993363	0.099494	0.0991282	1.00369									ymax	978.5
> #Fitting of exponential curve to ET vs P																	0.2			0.19558	0.196382	0.194593	1.00919									b	-110600
> startvals <- c(b=-2000,ymax=1400,k=-0.001)																	0.3			0.286679	0.288629	0.284375	1.01496									k	-0.008042
> nonlin1<-nls(ET~ymax+b*exp(k*Rain), y, start = startvals)																	0.4			0.371091	0.374572	0.36709	1.02038
> summary(nonlin1)																	0.5			0.447774	0.452989	0.4419	1.02509									600	90.9407
																	0.6			0.516205	0.523163	0.50848	1.02888									650	384.799
Formula: ET ~ ymax + b * exp(k * Rain)																	0.7			0.576356	0.584906	0.566959	1.03166									700	581.365
																	0.8			0.628604	0.638488	0.617808	1.03347									750	712.851
Parameters:																	0.9			0.673601	0.684515	0.66172	1.03445									800	800.804
Estimate Std. Error t value Pr(>|t|)																	1			0.712151	0.723791	0.699492	1.03474									850	859.637
b -1.106e+05 2.035e+05 -0.544 0.58899																	1.1			0.745095	0.757187	0.731935	1.0345									900	898.991
ymax 9.785e+02 3.055e+01 32.029 < 2e-16 ***																	1.2			0.773245	0.785559	0.759813	1.03388									950	925.315
k -8.042e-03 2.658e-03 -3.026 0.00379 **																	1.3			0.797334	0.809691	0.783817	1.03301									1000	942.924
---																	1.4			0.818008	0.830269	0.804546	1.03197									1050	954.703
Signif. codes: 0 ‘***’ 0.001 ‘**’ 0.01 ‘*’ 0.05 ‘.’ 0.1 ‘ ’ 1																	1.5			0.835814	0.84788	0.822514	1.03084									1100	962.582
																	1.6			0.851217	0.863017	0.838154	1.02966									1150	967.852
Residual standard error: 169.3 on 54 degrees of freedom																	1.7			0.864599	0.876088	0.851826	1.02848				Y = a + be-kx					1200	971.377
																	1.8			0.87628	0.887428	0.863831	1.02732									1250	973.736
Number of iterations to convergence: 11																	1.9			0.886524	0.897316	0.87442	1.02618									1300	975.313
Achieved convergence tolerance: 5.332e-06																	2			0.895548	0.905977	0.8838	1.02509									1350	976.368
																	2.5			0.927728	0.936431	0.917725	1.02038									1400	977.074
> mm <- model.matrix(~ 0 + Genus, y)																				0	0											1600	978.215
>																				1	1											1800	978.443
> #different ymax?																				2.5	1											2000	978.489
> startvals2 <-c(ymax1=1400,ymax2=1400,b=-2000,k=-0.001)																																2200	978.498
> nonlin2<-nls(ET~drop(mm %*% c(ymax1,ymax2))+b*exp(k*Rain), y, start = startvals2)
> nonlin2																														1.78
Nonlinear regression model																														1.81
model: ET ~ drop(mm %*% c(ymax1, ymax2)) + b * exp(k * Rain)																														1.82		600	1
data: y																													All	Pine	Euc	850	1
ymax1 ymax2 b k																												intercept	0.264			1100	1
1.001e+03 9.608e+02 -8.624e+04 -7.690e-03																												slope	0.0002927			1350	1
residual sum-of-squares: 1525698																												500	0.41035			1600	1
																												2250	0.922575			1850	1
Number of iterations to convergence: 10																																2100	1
Achieved convergence tolerance: 8.76e-06																																2350	1
> anova(nonlin1,nonlin2) #does the group factor have a significantly different b (const) term?
Analysis of Variance Table
Model 1: ET ~ ymax + b * exp(k * Rain)
Model 2: ET ~ drop(mm %*% c(ymax1, ymax2)) + b * exp(k * Rain)
Res.Df Res.Sum Sq Df Sum Sq F value Pr(>F)
1 54 1548482
2 53 1525698 1 22784 0.7915 0.3777
>
>
> #different b?
> startvals3 <-c(ymax=1400,b1=-2000,b2=-2000,k=-0.001)
> nonlin3<-nls(ET~ymax+drop(mm %*% c(b1,b2))*exp(k*Rain), y, start = startvals3)
> nonlin3
Nonlinear regression model
model: ET ~ ymax + drop(mm %*% c(b1, b2)) * exp(k * Rain)
data: y
ymax b1 b2 k
9.744e+02 -3.070e+05 -2.504e+05 -9.316e-03
residual sum-of-squares: 1541273
Number of iterations to convergence: 16
Achieved convergence tolerance: 8.062e-06
> anova(nonlin1,nonlin3) #does the group factor have a significantly different b (const) term?
Analysis of Variance Table
Model 1: ET ~ ymax + b * exp(k * Rain)
Model 2: ET ~ ymax + drop(mm %*% c(b1, b2)) * exp(k * Rain)
Res.Df Res.Sum Sq Df Sum Sq F value Pr(>F)
1 54 1548482
2 53 1541273 1 7209.7 0.2479 0.6206
>
> #different k?
> startvals4 <-c(ymax=1400,b=-2000,k1=-0.001,k2=-0.001)
> nonlin4<-nls(ET~ymax+b*exp(drop(mm %*% c(k1,k2))*Rain), y, start = startvals4)
> nonlin4
Nonlinear regression model
model: ET ~ ymax + b * exp(drop(mm %*% c(k1, k2)) * Rain)
data: y
ymax b k1 k2
9.754e+02 -2.070e+05 -8.819e-03 -9.012e-03
residual sum-of-squares: 1545220
Number of iterations to convergence: 16
Achieved convergence tolerance: 5.904e-06
> anova(nonlin1,nonlin4) #does the group factor have a significantly different b (const) term?
Analysis of Variance Table
Model 1: ET ~ ymax + b * exp(k * Rain)
Model 2: ET ~ ymax + b * exp(drop(mm %*% c(k1, k2)) * Rain)
Res.Df Res.Sum Sq Df Sum Sq F value Pr(>F)
1 54 1548482
2 53 1545220 1 3262.7 0.1119 0.7393
>
> #linear model of ET/PET vs Precipitation
> y$Method<-factor(y$Method)
> y$MethodGrp1<-y$Method #1=bottom up water balance, 2=stand scale, 3=catchment scale, 4=eddy covariance
> y$MethodGrp2<-y$Method #1=bottom up water balance, 2=stand scale, 3=catchment scale, 4=eddy covariance
> levels(y$MethodGrp1)=c("Stand","Stand","Catchment","Stand") #stand vs catchment scale
> levels(y$MethodGrp2)=c("Components","Stand","Catchment","Stand") #components vs stand vs catchment scale
>
> linmod1<-lm(k.actual~Rain.1,data=y)
> summary(linmod1)
Call:
lm(formula = k.actual ~ Rain.1, data = y)
Residuals:
Min 1Q Median 3Q Max
-0.25540 -0.09853 0.01055 0.08731 0.31397
Coefficients:
Estimate Std. Error t value Pr(>|t|)
(Intercept) 2.640e-01 6.173e-02 4.277 7.6e-05 ***
Rain.1 2.927e-04 4.816e-05 6.078 1.2e-07 ***
---
Signif. codes: 0 ‘***’ 0.001 ‘**’ 0.01 ‘*’ 0.05 ‘.’ 0.1 ‘ ’ 1
Residual standard error: 0.1408 on 55 degrees of freedom
Multiple R-squared: 0.4018, Adjusted R-squared: 0.3909
F-statistic: 36.94 on 1 and 55 DF, p-value: 1.204e-07
> linmod2<-lm(k.actual~Rain.1+Genus,data=y)
> summary(linmod2)
Call:
lm(formula = k.actual ~ Rain.1 + Genus, data = y)
Residuals:
Min 1Q Median 3Q Max
-0.27020 -0.11805 0.02019 0.09508 0.28660
Coefficients:
Estimate Std. Error t value Pr(>|t|)
(Intercept) 3.031e-01 6.686e-02 4.534 3.26e-05 ***
Rain.1 2.839e-04 4.808e-05 5.904 2.43e-07 ***
GenusPine -5.381e-02 3.728e-02 -1.443 0.155
---
Signif. codes: 0 ‘***’ 0.001 ‘**’ 0.01 ‘*’ 0.05 ‘.’ 0.1 ‘ ’ 1
Residual standard error: 0.1394 on 54 degrees of freedom
Multiple R-squared: 0.424, Adjusted R-squared: 0.4027
F-statistic: 19.87 on 2 and 54 DF, p-value: 3.4e-07
> linmod3<-lm(k.actual~Rain.1+Genus+MethodGrp1,data=y) #stand vs catchment
> summary(linmod3)
Call:
lm(formula = k.actual ~ Rain.1 + Genus + MethodGrp1, data = y)
Residuals:
Min 1Q Median 3Q Max
-0.254110 -0.106520 0.002006 0.085058 0.301688
Coefficients:
Estimate Std. Error t value Pr(>|t|)
(Intercept) 2.919e-01 6.812e-02 4.286 7.71e-05 ***
Rain.1 2.809e-04 4.827e-05 5.820 3.50e-07 ***
GenusPine -5.484e-02 3.737e-02 -1.468 0.148
MethodGrp1Catchment 3.357e-02 3.723e-02 0.902 0.371
---
Signif. codes: 0 ‘***’ 0.001 ‘**’ 0.01 ‘*’ 0.05 ‘.’ 0.1 ‘ ’ 1
Residual standard error: 0.1396 on 53 degrees of freedom
Multiple R-squared: 0.4327, Adjusted R-squared: 0.4006
F-statistic: 13.48 on 3 and 53 DF, p-value: 1.187e-06
> linmod4<-lm(k.actual~Rain.1+Genus+MethodGrp2,data=y) #cpts vs stand vs catchment
> summary(linmod4)
Call:
lm(formula = k.actual ~ Rain.1 + Genus + MethodGrp2, data = y)
Residuals:
Min 1Q Median 3Q Max
-0.24476 -0.09311 0.01153 0.10034 0.33053
Coefficients:
Estimate Std. Error t value Pr(>|t|)
(Intercept) 2.517e-01 7.006e-02 3.593 0.000726 ***
Rain.1 2.895e-04 4.743e-05 6.104 1.32e-07 ***
GenusPine -6.295e-02 3.680e-02 -1.711 0.093096 .
MethodGrp2Stand 9.623e-02 5.196e-02 1.852 0.069699 .
MethodGrp2Catchment 6.747e-02 4.075e-02 1.656 0.103783
---
Signif. codes: 0 ‘***’ 0.001 ‘**’ 0.01 ‘*’ 0.05 ‘.’ 0.1 ‘ ’ 1
Residual standard error: 0.1366 on 52 degrees of freedom
Multiple R-squared: 0.4678, Adjusted R-squared: 0.4269
F-statistic: 11.43 on 4 and 52 DF, p-value: 9.935e-07
> linmod5<-lm(k.actual~Rain.1+Genus+Method,data=y) #all methods separately
> summary(linmod5)
Call:
lm(formula = k.actual ~ Rain.1 + Genus + Method, data = y)
Residuals:
Min 1Q Median 3Q Max
-0.25565 -0.09157 0.00917 0.09898 0.33173
Coefficients:
Estimate Std. Error t value Pr(>|t|)
(Intercept) 2.486e-01 7.236e-02 3.436 0.00118 **
Rain.1 2.909e-04 4.838e-05 6.013 1.96e-07 ***
GenusPine -6.000e-02 3.996e-02 -1.502 0.13935
Method2 1.057e-01 7.063e-02 1.497 0.14066
Method3 6.720e-02 4.115e-02 1.633 0.10862
Method4 8.764e-02 6.774e-02 1.294 0.20155
---
Signif. codes: 0 ‘***’ 0.001 ‘**’ 0.01 ‘*’ 0.05 ‘.’ 0.1 ‘ ’ 1
Residual standard error: 0.1378 on 51 degrees of freedom
Multiple R-squared: 0.4682, Adjusted R-squared: 0.4161
F-statistic: 8.981 on 5 and 51 DF, p-value: 3.603e-06
>
